# Supplementary material for: A high-throughput metabolomic approach to explore the regulatory effect of mangiferin on metabolic network disturbances of hyperlipidemia rats
Source: Royal Society of Chemistry journal article supplement (doi:10.1039/c4mb00421c), 2014-10-24
Supplement: c4mb00421c2.pdf [file c4mb00421c2.pdf]

Table S1. Result from ingenuity pathway analysis with MetPA.

| No | Pathway Name                                | Total | Hits | p        | -log(p) | Impact  |
|----|---------------------------------------------|-------|------|----------|---------|---------|
| 1a | Taurine and hypotaurine metabolism          | 8     | 1    | 0.082653 | 2.4931  | 0.42857 |
| 2b | Glyoxylate and dicarboxylate metabolism     | 16    | 1    | 0.1589   | 1.8395  | 0.2963  |
| 3c | Glycine, serine and threonine metabolism    | 32    | 2    | 0.044048 | 3.1225  | 0.29197 |
| 4d | Citrate cycle (TCA cycle)                   | 20    | 2    | 0.01817  | 4.008   | 0.08044 |
| 5e | Glycerophospholipid metabolism              | 30    | 2    | 0.039109 | 3.2414  | 0.06759 |
| 6f | Primary bile acid biosynthesis              | 46    | 2    | 0.084338 | 2.4729  | 0.05952 |
| 7  | Glutathione metabolism                      | 26    | 1    | 0.24589  | 1.4029  | 0.00573 |
| 8  | Alanine, aspartate and glutamate metabolism | 24    | 1    | 0.22919  | 1.4732  | 0.00316 |
| 9  | Purine metabolism                           | 68    | 1    | 0.52745  | 0.6397  | 0.00275 |
| 10 | Cyanoamino acid metabolism                  | 6     | 1    | 0.06261  | 2.7708  | 0.0     |
| 11 | Ascorbate and aldarate metabolism           | 9     | 1    | 0.092524 | 2.3803  | 0.0     |
| 12 | Methane metabolism                          | 9     | 1    | 0.092524 | 2.3803  | 0.0     |
| 13 | Nitrogen metabolism                         | 9     | 1    | 0.092524 | 2.3803  | 0.0     |
| 14 | Caffeine metabolism                         | 12    | 1    | 0.12155  | 2.1075  | 0.0     |
| 15 | Porphyrin and chlorophyll metabolism        | 27    | 1    | 0.25411  | 1.37    | 0.0     |
| 16 | Drug metabolism - other enzymes             | 30    | 1    | 0.27827  | 1.2792  | 0.0     |
| 17 | Tyrosine metabolism                         | 42    | 1    | 0.3678   | 1.0002  | 0.0     |
| 18 | Arginine and proline metabolism             | 44    | 1    | 0.38168  | 0.96318 | 0.0     |
| 19 | Aminoacyl-tRNA biosynthesis                 | 67    | 1    | 0.52208  | 0.64993 | 0.0     |

Note: Total is the total number of compounds in the pathway; the Hits is the actually matched number from the user uploaded data; the Raw p is the original p value calculated from the enrichment analysis; the Impact is the pathway impact value calculated from pathway topology analysis.
